# Supplementary material for: The Association between Maternal Oral Inflammation and Neutrophil Phenotypes and Poly-Unsaturated Fatty Acids Composition in Human Milk: A Prospective Cohort Study
Source: Cells. 2022 Dec 17;11(24):4110. doi: 10.3390/cells11244110 (PMC9777263; doi:10.3390/cells11244110)
Supplement: Supplementary file 1 [file cells-11-04110-s001.zip › Supplementary Table S1.pdf]

**Supplementary Table S1.** Dietary intake of lactating women across the health, moderate and severe OIL groups

| Maternal dietary intake                    | Baseline (n=40)      |                   |                   |                    | Follow-up (n=42)     |                      |                      |               |
|--------------------------------------------|----------------------|-------------------|-------------------|--------------------|----------------------|----------------------|----------------------|---------------|
|                                            | Healthy<br>(n=17)    | Moderate<br>(n=6) | Severe<br>(n=17)  | p-value            | Healthy<br>(n=13)    | Moderate<br>(n=12)   | Severe<br>(n=17)     | p-value       |
|                                            | Mean (SD)            | Mean (SD)         | Mean (SD)         |                    | Mean (SD)            | Mean (SD)            | Mean (SD)            |               |
| <b>Energy (kcal/day)</b>                   | 2129.97<br>( 761.19) | 2537.97 ( 618.55) | 2032.67 ( 876.87) | 0.415 <sup>a</sup> | 2020.27<br>( 877.75) | 2196.24<br>( 524.10) | 1816.29<br>( 585.74) | 0.250         |
| <b>Total lipids (g/day)</b>                | 87.51<br>( 45.76)    | 106.93 ( 41.24)   | 83.24 ( 63.80)    | 0.361              | 79.86 ( 47.75)       | 94.72 ( 35.54)       | 72.22 ( 34.83)       | 0.321         |
| <b>SFAs (g)</b>                            | 33.93<br>( 20.97)    | 32.08 ( 15.53)    | 25.90 ( 17.56)    | 0.415              | 25.43 ( 15.46)       | 33.45 ( 19.73)       | 23.57 ( 13.00)       | 0.347         |
| <b>MUFAs (g)</b>                           | 29.50<br>( 17.24)    | 41.55 ( 17.35)    | 31.35 ( 26.17)    | 0.204              | 29.29 ( 21.88)       | 34.13 ( 13.79)       | 28.06 ( 14.82)       | 0.393         |
| <b>PUFAs (g)</b>                           | 15.77 ( 7.64)        | 23.74 ( 9.51)     | 18.78 ( 20.43)    | 0.155              | 17.72 ( 12.02)       | 19.17 ( 9.73)        | 14.92 ( 7.16)        | 0.618         |
| <b>Eicosapentaenoic acid<br/>(EPA) (g)</b> | 0.03 ( 0.05)         | 0.38 ( 0.51)      | 0.12 ( 0.35)      | 0.171              | 0.11 ( 0.23)         | 0.11 ( 0.31)         | 0.004 ( 0.005)       | <b>0.007*</b> |
| <b>Docosapentaenoic acid<br/>(DPA) (g)</b> | 0.02 ( 0.01)         | 0.11 ( 0.15)      | 0.04 ( 0.08)      | 0.113              | 0.04 ( 0.08)         | 0.03 ( 0.07)         | 0.01 ( 0.01)         | 0.168         |
| <b>Docosahexaenoic acid<br/>(DHA) (g)</b>  | 0.05 ( 0.07)         | 0.59 ( 0.75)      | 0.21 ( 0.55)      | 0.068              | 0.24 ( 0.56)         | 0.22 ( 0.59)         | 0.02 ( 0.03)         | 0.123         |

<sup>a</sup>One-way ANOVA. \* Differences between Severe and Healthy, and Severe and Moderate OIL groups.
