# Supplementary material for: The Association between Maternal Oral Inflammation and Neutrophil Phenotypes and Poly-Unsaturated Fatty Acids Composition in Human Milk: A Prospective Cohort Study
Source: Cells. 2022 Dec 17;11(24):4110. doi: 10.3390/cells11244110 (PMC9777263; doi:10.3390/cells11244110)
Supplement: Supplementary file 1 [file cells-11-04110-s001.zip › Supplementary Table S2.pdf]

**Supplementary Table S2.** Mean  $\pm$  SD Values comparing Neutrophils and CD biomarkers in human milk and oral cavity at baseline and follow-up

| Neutrophils and CD biomarkers <sup>†</sup>       | Baseline (N=48*)    |                     | P-value                  | Follow-up (N=46)    |                     | P-value                  |
|--------------------------------------------------|---------------------|---------------------|--------------------------|---------------------|---------------------|--------------------------|
|                                                  | Oral Cavity         | Human Milk          |                          | Oral Cavity         | Human Milk          |                          |
| <b>Absolute PMN count (x10<sup>6</sup>/10ml)</b> | 1.29 $\pm$ 1.59     | 0.11 $\pm$ 0.40     | <b>0.000<sup>a</sup></b> | 1.93 $\pm$ 4.24     | 0.14 $\pm$ 0.4      | <b>0.000<sup>a</sup></b> |
| <b>CD16</b>                                      | 474.5 $\pm$ 190.5   | 512.7 $\pm$ 354.5   | 0.406                    | 507.0 $\pm$ 182.3   | 399.7 $\pm$ 193.4   | <b>0.001<sup>a</sup></b> |
| <b>CD66a</b>                                     | 479.1 $\pm$ 162.6   | 468.9 $\pm$ 201.3   | 0.457                    | 469.8 $\pm$ 153.3   | 426.5 $\pm$ 146.9   | 0.112                    |
| <b>CD11b</b>                                     | 601.8 $\pm$ 278.9   | 493.6 $\pm$ 225.1   | <b>0.020<sup>a</sup></b> | 548.4 $\pm$ 250.6   | 376.4 $\pm$ 167.9   | <b>0.000<sup>a</sup></b> |
| <b>CD18</b>                                      | 5537.6 $\pm$ 2409.5 | 4122.0 $\pm$ 1879.8 | <b>0.000<sup>a</sup></b> | 4108.4 $\pm$ 3148.2 | 2823.8 $\pm$ 1431.7 | <b>0.001<sup>a</sup></b> |
| <b>CD64</b>                                      | 41.9 $\pm$ 17.2     | 92.0 $\pm$ 66.2     | <b>0.000<sup>a</sup></b> | 45.9 $\pm$ 41.2     | 72.1 $\pm$ 106.4    | <b>0.016<sup>a</sup></b> |
| <b>CD63</b>                                      | 300.9 $\pm$ 124.1   | 311.3 $\pm$ 168.1   | 0.825                    | 270.1 $\pm$ 111.1   | 236.7 $\pm$ 100.9   | <b>0.042<sup>a</sup></b> |

<sup>a</sup>Significance level= 0.05. Data are presented as Mean  $\pm$  SD

\*N=48 instead of 50. Since two of the human milk samples were excluded at baseline due to the unavailability of data from the flow cytometry

<sup>†</sup>For the CD markers, data is presented as the geometric mean fluorescence intensity (MFI) for each CD marker
