# Supplementary material for: The Association between Maternal Oral Inflammation and Neutrophil Phenotypes and Poly-Unsaturated Fatty Acids Composition in Human Milk: A Prospective Cohort Study
Source: Cells. 2022 Dec 17;11(24):4110. doi: 10.3390/cells11244110 (PMC9777263; doi:10.3390/cells11244110)
Supplement: Supplementary file 1 [file cells-11-04110-s001.zip › Supplementary Table S3.pdf]

**Supplementary Table S3.** Differences in the absolute hmPMN and CD markers levels in OIL groups at baseline and follow-up

| Neutrophils<br>and CD<br>biomarkers <sup>†</sup>           | Baseline (N=48 <sup>a</sup> ) |                                   |                                  |             | Follow-up (N=46)  |                                    |                                  |         |
|------------------------------------------------------------|-------------------------------|-----------------------------------|----------------------------------|-------------|-------------------|------------------------------------|----------------------------------|---------|
|                                                            | Healthy<br>(n=20)             | Moderate<br>Inflammation<br>(n=7) | Severe<br>Inflammation<br>(n=21) | P-<br>value | Healthy<br>(n=16) | Moderate<br>Inflammation<br>(n=13) | Severe<br>Inflammation<br>(n=17) | P-value |
| <b>Absolute<br/>hmPMN count<br/>(x10<sup>6</sup>/10ml)</b> | 0.17 ± 0.58                   | 0.19 ± 0.19                       | 0.07 ± 0.25                      | 0.850       | 0.05 ± 0.07       | 0.22 ± 0.64                        | 0.16 ± 0.27                      | 0.407   |
| <b>CD16</b>                                                | 469.1 ± 184.9                 | 529.1 ± 223.2                     | 548.7 ± 494.5                    | 0.814       | 483.9 ± 263.8     | 326.5 ± 82.5                       | 376.4 ± 151.8                    | 0.148   |
| <b>CD66a</b>                                               | 411.6 ± 157.0                 | 541.1 ± 284.3                     | 499.5 ± 203.5                    | 0.278       | 438.3 ± 168.7     | 437.4 ± 116.3                      | 407.2 ± 152.4                    | 0.667*  |
| <b>CD11b</b>                                               | 522.3 ± 307.6                 | 513.9 ± 120.0                     | 459.6 ± 150.7                    | 0.510       | 428.2 ± 207.3     | 364.5 ± 126.2                      | 336.7 ± 150.2                    | 0.334   |
| <b>CD18</b>                                                | 4193.3 ± 2108.0               | 3849.0 ± 1448.9                   | 4145.0 ± 1849.7                  | 0.915*      | 2569.7 ± 1115.7   | 3088.0 ± 1358.4                    | 2861.0 ± 1758.3                  | 0.666   |
| <b>CD14</b>                                                | 174.9 ± 221.6                 | 150.1 ± 111.8                     | 115.3 ± 120.7                    | 0.363       | 133.2 ± 106.5     | 189.6 ± 154.3                      | 214.2 ± 144.6                    | 0.274   |
| <b>CD64</b>                                                | 72.8 ± 28.6                   | 122.9 ± 87.7                      | 100.6 ± 80.3                     | 0.556       | 94.6 ± 168.8      | 65.2 ± 70.6                        | 56.1 ± 28.7                      | 0.606   |
| <b>CD63</b>                                                | 284.3 ± 144.1                 | 331.9 ± 198.6                     | 330.1 ± 183.3                    | 0.789       | 241.3 ± 116.7     | 269.2 ± 92.7                       | 207.4 ± 88.3                     | 0.289*  |

\*One-way ANOVA (for normally-distributed data)

<sup>†</sup> For the CD markers, data is presented as the geometric mean fluorescence intensity (MFI) for each CD marker

<sup>a</sup> N=48 instead of 50. Since two of the human milk samples were excluded at baseline due to the unavailability of data from the flow cytometry

Data are presented as Mean ± SD
