# Supplementary material for: The Association between Maternal Oral Inflammation and Neutrophil Phenotypes and Poly-Unsaturated Fatty Acids Composition in Human Milk: A Prospective Cohort Study
Source: Cells. 2022 Dec 17;11(24):4110. doi: 10.3390/cells11244110 (PMC9777263; doi:10.3390/cells11244110)
Supplement: Supplementary file 1 [file cells-11-04110-s001.zip › Supplementary Table S4.pdf]

**Supplementary Table S4.** Human milk fatty acids profile according to maternal oral inflammatory load state at baseline and follow-up

| Fatty acids in human milk | Baseline (n=50) |                |               |                            |                                       | Follow-up (n=46) |                 |               |                            |                                       |
|---------------------------|-----------------|----------------|---------------|----------------------------|---------------------------------------|------------------|-----------------|---------------|----------------------------|---------------------------------------|
|                           | Healthy (n=21)  | Moderate (n=8) | Severe (n=21) | Unadjusted <i>p</i> -value | Adjusted <i>p</i> -value <sup>b</sup> | Healthy (n=16)   | Moderate (n=13) | Severe (n=17) | Unadjusted <i>p</i> -value | Adjusted <i>p</i> -value <sup>b</sup> |
|                           | Mean (SD)       | Mean (SD)      | Mean (SD)     |                            |                                       | Mean (SD)        | Mean (SD)       | Mean (SD)     |                            |                                       |
| C10:0                     | 0.76 ( 0.53)    | 0.90 ( 0.39)   | 0.88 ( 0.44)  | 0.393                      | 0.247                                 | 0.68 ( 0.35)     | 0.60 ( 0.42)    | 0.67 ( 0.34)  | 0.793                      | 0.479                                 |
| C12:0                     | 5.06 ( 1.64)    | 5.82 ( 2.55)   | 5.49 ( 2.00)  | 0.510                      | 0.427                                 | 4.96 ( 1.01)     | 5.21 ( 2.25)    | 4.44 ( 2.13)  | 0.243                      | 0.668                                 |
| C14:0                     | 5.78 ( 1.60)    | 5.92 ( 2.30)   | 5.90 ( 1.88)  | 0.949                      | 0.895                                 | 5.85 ( 1.73)     | 6.30 ( 2.45)    | 4.85 ( 2.18)  | 0.122                      | 0.280                                 |
| C16:0                     | 19.25 ( 3.90)   | 17.76 ( 2.51)  | 18.39 ( 2.81) | 0.476                      | 0.113                                 | 18.91 ( 3.92)    | 18.41 ( 3.98)   | 18.08 ( 3.52) | 0.825                      | 0.339                                 |
| C18:0                     | 7.22 ( 1.37)    | 6.61 ( 1.29)   | 6.74 ( 1.09)  | 0.155                      | 0.330                                 | 6.86 ( 1.67)     | 7.39 ( 2.19)    | 7.33 ( 1.41)  | 0.652                      | 0.879                                 |
| C20:0                     | 0.15 ( 0.06)    | 0.14 ( 0.03)   | 0.15 ( 0.06)  | 0.865                      | 0.831                                 | 0.13 ( 0.04)     | 0.15 ( 0.07)    | 0.16 ( 0.05)  | 0.479                      | 0.231                                 |
| C22:0                     | 0.06 ( 0.06)    | 0.06 ( 0.05)   | 0.06 ( 0.08)  | 0.598                      | 0.877                                 | 0.02 ( 0.03)     | 0.02 ( 0.02)    | 0.03 ( 0.04)  | 0.152                      | 0.051                                 |
| C23:0                     | 0.24 ( 0.42)    | 0.42 ( 0.37)   | 0.25 ( 0.24)  | 0.163                      | 0.684                                 | 0.33 ( 0.33)     | 0.24 ( 0.25)    | 0.16 ( 0.24)  | 0.114                      | 0.068                                 |
| C24:0                     | 0.04 ( 0.05)    | 0.05 ( 0.04)   | 0.04 ( 0.05)  | 0.631                      | 0.762                                 | 0.01 ( 0.01)     | 0.01 ( 0.02)    | 0.02 ( 0.06)  | 0.300                      | 0.135                                 |
| <b>SFAs</b>               | 38.54 ( 6.55)   | 37.72 ( 5.16)  | 37.94 ( 6.02) | 0.706                      | 0.440                                 | 37.77 ( 5.75)    | 38.37 ( 4.28)   | 35.78 ( 7.65) | 0.481                      | 0.296                                 |
| C14:1                     | 0.25 ( 0.11)    | 0.21 ( 0.11)   | 0.25 ( 0.12)  | 0.768                      | 0.773                                 | 0.26 ( 0.14)     | 0.18 ( 0.09)    | 0.20 ( 0.11)  | 0.372                      | 0.274                                 |
| C18:1n-7                  | 5.94 ( 11.78)   | 6.77 ( 13.18)  | 2.18 ( 0.32)  | 0.890                      | 0.607                                 | 7.52 ( 15.31)    | 1.93 ( 0.63)    | 2.15 ( 0.23)  | 0.612                      | 0.196                                 |
| C18:1n-9                  | 34.73 ( 12.58)  | 32.02 ( 13.38) | 39.53 ( 4.83) | 0.199                      | 0.362                                 | 35.91 ( 15.19)   | 42.16 ( 6.89)   | 43.81 ( 5.00) | 0.152                      | 0.051                                 |
| C20:1n-9                  | 0.46 ( 0.15)    | 0.43 ( 0.08)   | 0.43 ( 0.12)  | 0.721                      | 0.363                                 | 0.39 ( 0.19)     | 0.38 ( 0.08)    | 0.40 ( 0.11)  | 0.610                      | 0.980                                 |
| C22:1n-9                  | 0.09 ( 0.11)    | 0.12 ( 0.07)   | 0.07 ( 0.06)  | 0.181                      | 0.461                                 | 0.14 ( 0.34)     | 0.07 ( 0.08)    | 0.03 ( 0.05)  | 0.160                      | 0.223                                 |
| <b>MUFAs</b>              | 41.47 ( 5.14)   | 39.56 ( 3.39)  | 42.47 ( 5.06) | 0.889                      | 0.393                                 | 44.24 ( 6.56)    | 44.74 ( 6.73)   | 46.61 ( 5.08) | 0.509                      | 0.186                                 |
| C18:2n-6 (LA)             | 12.79 ( 5.69)   | 15.13 ( 2.58)  | 13.16 ( 6.84) | 0.762                      | 0.981                                 | 11.86 ( 6.16)    | 10.79 ( 7.52)   | 12.17 ( 8.21) | 0.303                      | 0.946                                 |
| C18:3n-6 (GLA)            | 0.15 ( 0.06)    | 0.15 ( 0.06)   | 0.12 ( 0.06)  | 0.354                      | 0.533                                 | 0.12 ( 0.04)     | 0.11 ( 0.06)    | 0.12 ( 0.04)  | 0.456                      | 0.631                                 |

|                   |               |               |                |                          |               |               |                |                |       |       |
|-------------------|---------------|---------------|----------------|--------------------------|---------------|---------------|----------------|----------------|-------|-------|
| C20:2n-6          | 0.40 ( 0.73)  | 0.35 ( 0.16)  | 0.33 ( 0.21)   | 0.286                    | 0.768         | 0.21 ( 0.12)  | 0.24 ( 0.14)   | 0.19 ( 0.11)   | 0.685 | 0.663 |
| C20:3n-6          | 0.63 ( 0.18)  | 0.58 ( 0.13)  | 0.55 ( 0.14)   | 0.151                    | 0.236         | 0.35 ( 0.05)  | 0.36 ( 0.11)   | 0.35 ( 0.07)   | 0.960 | 0.684 |
| C20:4n-6<br>(AA)  | 0.72 ( 0.19)  | 0.77 ( 0.19)  | 0.73 ( 0.18)   | 0.608                    | 0.649         | 0.57 ( 0.15)  | 0.64 ( 0.14)   | 0.62 ( 0.09)   | 0.359 | 0.750 |
| C22:2n-6          | 2.81 ( 4.59)  | 2.49 ( 1.45)  | 2.05 ( 1.28)   | 0.350                    | 0.666         | 2.41 ( 1.47)  | 2.24 ( 1.21)   | 1.71 ( 0.99)   | 0.315 | 0.113 |
| C22:4n-6          | 0.11 ( 0.14)  | 0.29 ( 0.21)  | 0.17 ( 0.15)   | 0.070                    | <b>0.018*</b> | 0.14 ( 0.16)  | 0.12 ( 0.11)   | 0.12 ( 0.14)   | 0.902 | 0.459 |
| C22:5n-6          | 0.08 ( 0.06)  | 0.15 ( 0.06)  | 0.13 ( 0.09)   | <b>0.036<sup>a</sup></b> | <b>0.026*</b> | 0.08 ( 0.06)  | 0.12 ( 0.12)   | 0.05 ( 0.04)   | 0.217 | 0.909 |
| <b>N-6</b>        | 17.69 ( 7.50) | 19.94 ( 3.52) | 17.27 ( 7.37)  | 0.813                    | 0.820         | 15.77 ( 6.91) | 14.65 ( 8.47)  | 15.36 ( 8.91)  | 0.794 | 0.847 |
| C18:3n-3<br>(ALA) | 1.67 ( 0.68)  | 1.86 ( 0.43)  | 1.54 ( 0.88)   | 0.390                    | 0.344         | 1.64 ( 0.89)  | 1.80 ( 0.86)   | 1.79 ( 1.09)   | 0.615 | 0.390 |
| C20:5n-3<br>(EPA) | 0.07 ( 0.12)  | 0.17 ( 0.16)  | 0.11 ( 0.14)   | 0.228                    | 0.291         | 0.14 ( 0.15)  | 0.07 ( 0.07)   | 0.06 ( 0.09)   | 0.408 | 0.286 |
| C22:5n-3          | 0.11 ( 0.17)  | 0.23 ( 0.22)  | 0.15 ( 0.15)   | 0.289                    | 0.490         | 0.13 ( 0.14)  | 0.12 ( 0.13)   | 0.06 ( 0.13)   | 0.443 | 0.120 |
| C22:6n-3<br>(DHA) | 0.43 ( 0.30)  | 0.49 ( 0.31)  | 0.48 ( 0.30)   | 0.547                    | 0.362         | 0.26 ( 0.11)  | 0.23 ( 0.19)   | 0.29 ( 0.19)   | 0.509 | 0.942 |
| <b>N-3</b>        | 2.29 ( 0.83)  | 2.76 ( 1.00)  | 2.30 ( 1.12)   | 0.619                    | 0.209         | 2.19 ( 1.01)  | 2.23 ( 0.95)   | 2.22 ( 1.17)   | 0.773 | 0.682 |
| <b>PUFAs</b>      | 19.98 ( 7.46) | 22.71 ( 3.67) | 19.58 ( 7.83)  | 0.587                    | 0.984         | 17.97 ( 7.64) | 16.88 ( 8.78)  | 17.59 ( 8.98)  | 0.843 | 0.895 |
| <b>N6/N3</b>      | 10.05 ( 8.44) | 7.81 ( 2.45)  | 10.48 ( 13.37) | 0.986                    | 0.858         | 8.45 ( 5.46)  | 11.90 ( 21.98) | 13.46 ( 20.79) | 0.680 | 0.375 |
