# Supplementary material for: The Association between Maternal Oral Inflammation and Neutrophil Phenotypes and Poly-Unsaturated Fatty Acids Composition in Human Milk: A Prospective Cohort Study
Source: Cells. 2022 Dec 17;11(24):4110. doi: 10.3390/cells11244110 (PMC9777263; doi:10.3390/cells11244110)
Supplement: Supplementary file 1 [file cells-11-04110-s001.zip › Supplementary Table S5.pdf]

**Supplementary Table S5.** Correlation between hmPMNs and CD markers and the fatty acids levels in human milk at baseline

| Fatty acids in human milk | Human milk neutrophils (x10 <sup>6</sup> /10ml) | CD16   | CD66a         | CD11b         | CD18           | CD14             | CD64            | CD63           |
|---------------------------|-------------------------------------------------|--------|---------------|---------------|----------------|------------------|-----------------|----------------|
| C10:0                     | 0.135                                           | 0.038  | <b>0.453*</b> | <b>0.326*</b> | 0.194          | 0.216            | 0.051           | <b>0.447**</b> |
| C12:0                     | 0.268                                           | 0.057  | <b>0.362*</b> | 0.074         | <b>0.411**</b> | -0.056           | 0.017           | <b>0.307*</b>  |
| C14:0                     | 0.078                                           | -0.080 | 0.091         | 0.016         | 0.277          | 0.013            | -0.074          | 0.111          |
| C16:0                     | -0.053                                          | -0.136 | 0.037         | 0.128         | 0.044          | 0.142            | <b>-0.326*</b>  | 0.037          |
| C18:0                     | 0.110                                           | 0.008  | 0.009         | 0.063         | -0.153         | 0.116            | -0.113          | 0.073          |
| C20:0                     | -0.007                                          | 0.029  | 0.277         | 0.258         | 0.013          | 0.195            | -0.057          | 0.146          |
| C22:0                     | 0.024                                           | -0.128 | -0.024        | -0.068        | 0.033          | -0.209           | -0.246          | -0.067         |
| C23:0                     | 0.001                                           | 0.151  | 0.051         | -0.029        | -0.045         | <b>-0.329*</b>   | -0.052          | -0.057         |
| C24:0                     | 0.146                                           | -0.243 | -0.049        | -0.180        | 0.156          | <b>-0.327*</b>   | -0.191          | -0.069         |
| <b>SFAs</b>               | 0.049                                           | -0.098 | 0.146         | 0.088         | 0.182          | 0.108            | -0.116          | 0.141          |
| C14:1                     | -0.086                                          | -0.216 | -0.104        | 0.036         | -0.020         | -0.060           | <b>-0.383**</b> | -0.006         |
| C18:1n-7                  | -0.138                                          | -0.062 | -0.001        | 0.148         | -0.229         | 0.172            | -0.133          | -0.098         |
| C18:1n-9                  | -0.101                                          | -0.060 | -0.147        | -0.170        | -0.264         | -0.068           | 0.059           | <b>-0.288*</b> |
| C20:1n-9                  | 0.208                                           | 0.258  | -0.026        | 0.116         | 0.007          | 0.166            | 0.082           | -0.156         |
| C22:1n-9                  | 0.115                                           | -0.005 | 0.054         | 0.036         | <b>0.318*</b>  | -0.192           | -0.090          | -0.082         |
| <b>MUFAs</b>              | -0.063                                          | 0.004  | -0.103        | -0.031        | -0.270         | 0.069            | 0.022           | -0.252         |
| C18:2n-6 (LA)             | 0.030                                           | 0.170  | -0.165        | -0.062        | -0.021         | -0.013           | 0.219           | -0.110         |
| C18:3n-6 (GLA)            | 0.136                                           | -0.022 | -0.064        | -0.006        | 0.127          | 0.179            | 0.071           | -0.133         |
| C20:2n-6                  | 0.079                                           | -0.099 | 0.094         | -0.125        | <b>0.291*</b>  | 0.018            | 0.158           | 0.088          |
| C20:3n-6                  | 0.119                                           | -0.044 | -0.150        | -0.178        | 0.105          | 0.125            | -0.089          | -0.150         |
| C20:4n-6 (AA)             | 0.056                                           | -0.046 | -0.024        | -0.043        | 0.000          | 0.126            | -0.097          | -0.022         |
| C22:2n-6                  | 0.054                                           | 0.139  | -0.140        | -0.084        | -0.012         | <b>-0.525***</b> | -0.071          | -0.106         |
| C22:4n-6                  | -0.037                                          | 0.006  | 0.129         | -0.153        | 0.109          | <b>-0.484***</b> | -0.111          | -0.142         |

|                |        |        |        |        |        |                 |        |        |
|----------------|--------|--------|--------|--------|--------|-----------------|--------|--------|
| C22:5n-6       | -0.047 | -0.131 | -0.089 | -0.135 | -0.163 | 0.075           | 0.120  | -0.023 |
| <b>N-6</b>     | 0.001  | 0.157  | -0.151 | -0.121 | 0.049  | -0.137          | 0.134  | -0.074 |
| C18:3n-3 (ALA) | -0.033 | 0.157  | -0.073 | 0.082  | -0.088 | -0.035          | 0.077  | -0.142 |
| C20:5n-3 (EPA) | -0.150 | 0.048  | 0.046  | -0.069 | 0.095  | <b>-0.345*</b>  | -0.077 | -0.062 |
| C22:5n-3       | -0.095 | 0.029  | 0.012  | -0.248 | 0.066  | <b>-0.455**</b> | -0.086 | -0.178 |
| C22:6n-3 (DHA) | 0.190  | -0.085 | 0.222  | 0.099  | 0.282  | 0.120           | 0.068  | 0.147  |
| <b>N-3</b>     | 0.004  | 0.194  | 0.049  | 0.057  | 0.027  | -0.139          | 0.060  | -0.059 |
| <b>PUFAs</b>   | -0.047 | 0.117  | -0.072 | -0.101 | 0.038  | -0.145          | 0.151  | -0.045 |
| <b>N6/N3</b>   | -0.004 | -0.001 | -0.194 | -0.096 | -0.030 | -0.066          | 0.017  | -0.005 |

Data presented as spearman's correlation coefficients between hmPMNs and CD biomarkers and FAs composition in breast milk. \* represent p-values  $\leq 0.05$ , \*\* represent p-values  $< 0.01$ , \*\*\*represent p-values  $< 0.001$ .
