# Supplementary material for: The Association between Maternal Oral Inflammation and Neutrophil Phenotypes and Poly-Unsaturated Fatty Acids Composition in Human Milk: A Prospective Cohort Study
Source: Cells. 2022 Dec 17;11(24):4110. doi: 10.3390/cells11244110 (PMC9777263; doi:10.3390/cells11244110)
Supplement: Supplementary file 1 [file cells-11-04110-s001.zip › Supplementary Table S6.pdf]

**Supplementary Table S6.** Correlation between hmPMNs and CD markers and the fatty acids levels in human milk at follow-up

| Fatty acids in human milk | Human milk neutrophils (x10 <sup>6</sup> /10ml) | CD16           | CD66a  | CD11b  | CD18            | CD14            | CD64          | CD63            |
|---------------------------|-------------------------------------------------|----------------|--------|--------|-----------------|-----------------|---------------|-----------------|
| C10:0                     | 0.084                                           | -0.056         | 0.056  | -0.070 | -0.120          | -0.013          | 0.159         | 0.017           |
| C12:0                     | 0.034                                           | 0.023          | -0.076 | -0.012 | -0.152          | -0.001          | -0.147        | 0.008           |
| C14:0                     | -0.170                                          | -0.045         | 0.026  | -0.054 | -0.017          | 0.036           | -0.120        | 0.084           |
| C16:0                     | 0.073                                           | <b>0.292*</b>  | 0.140  | 0.093  | -0.223          | 0.216           | -0.056        | -0.166          |
| C18:0                     | 0.090                                           | 0.170          | -0.059 | -0.009 | -0.138          | <b>0.311*</b>   | -0.058        | <b>-0.396**</b> |
| C20:0                     | <b>0.397**</b>                                  | 0.148          | -0.124 | -0.063 | -0.108          | 0.153           | 0.081         | <b>-0.331*</b>  |
| C22:0                     | -0.221                                          | -0.242         | 0.036  | -0.062 | <b>-0.514**</b> | -0.079          | -0.049        | -0.001          |
| C23:0                     | <b>-0.335*</b>                                  | <b>-0.370*</b> | -0.064 | -0.158 | <b>-0.353*</b>  | <b>-0.558**</b> | 0.158         | 0.131           |
| C24:0                     | -0.271                                          | <b>-0.348*</b> | -0.032 | 0.027  | 0.120           | -0.048          | 0.284         | 0.244           |
| <b>SFAs</b>               | -0.018                                          | 0.239          | 0.101  | 0.067  | -0.244          | <b>0.304*</b>   | -0.051        | -0.097          |
| C14:1                     | <b>-0.296*</b>                                  | -0.064         | 0.043  | -0.186 | -0.090          | 0.009           | -0.036        | -0.042          |
| C18:1n-7                  | <b>0.393**</b>                                  | 0.245          | 0.218  | 0.132  | 0.197           | -0.065          | -0.165        | -0.017          |
| C18:1n-9                  | <b>0.501**</b>                                  | 0.104          | -0.166 | 0.005  | -0.064          | -0.068          | <b>0.314*</b> | -0.242          |
| C20:1n-9                  | <b>0.425**</b>                                  | 0.024          | 0.004  | 0.058  | 0.048           | -0.081          | -0.035        | -0.030          |
| C22:1n-9                  | -0.269                                          | -0.238         | -0.109 | -0.125 | 0.140           | <b>-0.353*</b>  | 0.073         | 0.163           |
| <b>MUFAs</b>              | <b>0.586***</b>                                 | 0.232          | -0.032 | 0.131  | -0.085          | -0.007          | <b>0.323*</b> | -0.181          |
| C18:2n-6 (LA)             | <b>-0.321*</b>                                  | <b>-0.337*</b> | -0.085 | -0.203 | 0.052           | -0.004          | 0.279         | 0.142           |
| C18:3n-6 (GLA)            | -0.053                                          | 0.021          | -0.028 | -0.226 | 0.085           | -0.171          | -0.216        | 0.061           |
| C20:2n-6                  | <b>-0.338*</b>                                  | -0.239         | -0.036 | -0.001 | <b>0.344*</b>   | -0.274          | 0.065         | 0.233           |
| C20:3n-6                  | 0.015                                           | 0.000          | -0.176 | -0.231 | -0.075          | -0.153          | <b>0.335*</b> | 0.028           |
| C20:4n-6 (AA)             | 0.008                                           | 0.273          | 0.045  | 0.149  | 0.120           | 0.038           | -0.114        | -0.050          |
| C22:2n-6                  | <b>-0.484**</b>                                 | <b>-0.350*</b> | -0.067 | -0.123 | 0.269           | -0.287          | 0.197         | 0.122           |
| C22:4n-6                  | -0.182                                          | -0.217         | 0.184  | 0.005  | 0.226           | -0.165          | <b>0.312*</b> | 0.278           |
| C22:5n-6                  | -0.190                                          | -0.121         | 0.024  | -0.015 | <b>0.321*</b>   | -0.231          | -0.134        | 0.140           |

|                |                 |                 |        |        |               |                 |        |        |
|----------------|-----------------|-----------------|--------|--------|---------------|-----------------|--------|--------|
| <b>N-6</b>     | <b>-0.381**</b> | <b>-0.351*</b>  | -0.041 | -0.171 | 0.160         | -0.101          | 0.282  | 0.210  |
| C18:3n-3 (ALA) | -0.239          | -0.202          | 0.020  | 0.075  | 0.251         | -0.180          | -0.042 | 0.221  |
| C20:5n-3 (EPA) | <b>-0.295*</b>  | <b>-0.332*</b>  | -0.158 | -0.178 | <b>0.367*</b> | <b>-0.501**</b> | 0.107  | 0.020  |
| C22:5n-3       | <b>-0.398**</b> | <b>-0.379**</b> | -0.108 | -0.067 | 0.287         | <b>-0.467**</b> | 0.132  | 0.197  |
| C22:6n-3 (DHA) | 0.109           | 0.265           | -0.117 | 0.211  | 0.063         | 0.130           | 0.021  | -0.114 |
| <b>N-3</b>     | -0.242          | -0.210          | -0.041 | 0.089  | <b>0.315*</b> | -0.284          | -0.008 | 0.226  |
| <b>PUFAs</b>   | <b>-0.440**</b> | <b>-0.393**</b> | -0.054 | -0.179 | 0.241         | -0.169          | 0.236  | 0.213  |
| <b>N6/N3</b>   | -0.117          | -0.044          | 0.004  | -0.213 | -0.127        | 0.066           | 0.124  | 0.073  |

Data presented as spearman's correlation coefficients between hmPMNs and CD biomarkers and FAs composition in breast milk. \* represent p-values  $\leq 0.05$ , \*\* represent p-values  $< 0.01$ , \*\*\*represent p-values  $< 0.001$
